# Supplementary material for: One-step zero-background IgG reformatting of phage-displayed antibody fragments enabling rapid and high-throughput lead identification
Source: PubMed Central journal article supplement (PMC3936716; doi:10.1093/nar/gkt1142), 2013-11-16
Supplement: supp_gkt1142_nar-01424-met-g-2013-File006.pdf [file supp_gkt1142_nar-01424-met-g-2013-File006.pdf]

## SUPPLEMENTARY INFORMATION

Supplementary Table 1: primers for light chain and VH amplification and reformatting

| Primer | Type   | Name       | Sequence 5' - 3'                              |
|--------|--------|------------|-----------------------------------------------|
| P1     | Kappa  | IFkappa    | <u>CTCCACAGGCGTGCA</u> CTCTGACATCCAGATGACCCAG |
|        | Lambda | IFayelt    | <u>CTCCACAGGCGTGCA</u> CTCACAGAGCGAATTGACTCAG |
|        |        | IFqsalt    | <u>CTCCACAGGCGTGCA</u> CTCACAGAGCGCTTTGACTCAG |
|        |        | IFqsvlt    | <u>CTCCACAGGCGTGCA</u> CTCACAGAGCGTCTTGACTCAG |
|        |        | IFsyelt    | <u>CTCCACAGGCGTGCA</u> CTCAAGCTACGAATTGACTCAG |
| P2     | Kappa  | IFCKBGHpAr | <u>CACAGTCGAGGCGCGC</u> CTTATTAACACTCTCCCCTGT |
|        | Lambda | IFCLBGHpAr | <u>CACAGTCGAGGCGCGC</u> CTTATTATGAACATTCTGTAG |
| P3     | VH     | IFCMVHf    | <u>CTCCGAAGTTCAATTG</u> TTAGAGTCTGGTGGCGGCCT  |
| P4     |        | IFhG4NheIR | <u>GGAGCAGGGCGCTAG</u> CGGGAAGACCGATGGGCCTTTG |

The primers were adapted from Jostock et al. 2004. As illustrated in Figure 1, Primers P1 and P2 are used to amplify the light chains (VL+CL) and P3 and P4 are used to amplify the VH region from the Fab clones. The 15bp extension required for In-Fusion cloning is either single or double-underlined. They are either complimentary to the vector (double-underlined) or to the InTag adaptor (single-underlined).

Supplementary Table 2: primers sequences for InTag adaptor generation

| ID | Name      | Sequence 5' - 3'                        | Product |
|----|-----------|-----------------------------------------|---------|
| 1  | BGHpAf    | AAAGGCGCGCCTCGACTGTGCCTTCTAG            | BGHpA   |
| 2  | BGH/CmRr  | TTTTACGTTTCTCGTTCAGCCATAGAGCCCACCGCATC  |         |
| 3  | BGH/CmRF  | GATGCGGTGGGCTCTATGGCTGAACGAGAAACGTAAAA  | CmR     |
| 4  | CmR/CMVr  | GTCAATAATCAATGTCAACTTACGCCCCGCCCTGCCA   |         |
| 5  | CmR/CMVf  | TGGCAGGGCGGGGCGTAAGTTGACATTGATTATTGAC   | pCMV    |
| 6  | CMV/SPr   | CAGCTCCATCCCATGGTGGCGGCCCTATAGTGAGTCGTA |         |
| 7  | CMV/SPf   | TACGACTCACTATAGGGCCGCCACCATGGGATGGAGCTG | Signal  |
| 8  | VHspR     | GCTGTGCACTCCAGTAGCTG                    |         |
| 9  | BGH/ZeoRr | GAGAAAATACCGCATCAGGCCATAGAGCCCACCGCA    | BGHpA   |
| 10 | BGH/ZeoRF | GATGCGGTGGGCTCTATGGGCTGATGCGGTATTTTC    | ZeoR    |
| 11 | ZeoR/CMVr | TGGCAGGGCGGGGCGTAAGTTGACATTGATTATTGA    |         |
| 12 | ZeoR/CMVf | GCCGAGGAGCAGGACTGACGTTGACATTGATTATTG    | pCMV    |

BGHpA: the bovine growth hormone polyadenylation signal, CmR: chloramphenicol resistance gene, ZeoR: zeocin resistance gene, pCMV: CMV promoter, Signal: antibody secretion signal

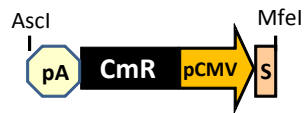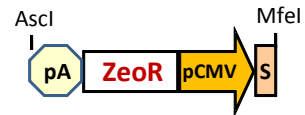

**Supplementary Figure 1. Schematic illustration of the InTag adaptors.**

pA: the bovine growth hormone polyadenylation signal, CmR: chloramphenicol resistance gene, ZeoR: zeocin resistance gene, pCMV: CMV promoter, S: antibody signal peptide.

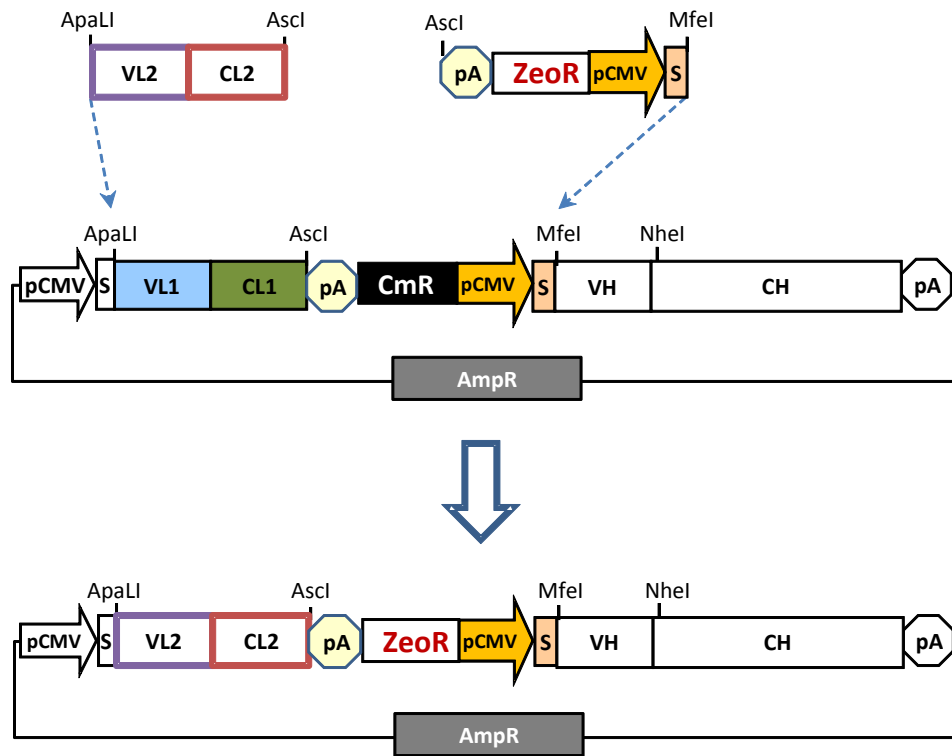

**Supplementary Figure 2. Schematic of the use of InTag positive selection for light chain swapping in guided selection strategies**

The original light chain (VL1+CL1) and the CmR InTag adaptor were removed from the IgG expression vector by ApaLI and Mfel digestion. A new light chain (VL2+CL2) was cloned into the expression vector along with the ZeoR InTag adaptor at the ApaLI and Mfel sites. The recombinant clones containing the new light chain were selected with Zeocin. The VH region can be similarly swapped using the Ascl and Nhel cloning sites.

pA: the bovine growth hormone polyadenylation signal, CmR: chloramphenicol resistance gene, ZeoR: zeocin resistance gene, pCMV: CMV promoter, S: antibody secretion signal. VL1: variable light region of antibody 1, VL2: variable light region of antibody 2, CL1: light constant region of antibody 1, CL2: light constant region of antibody 2.

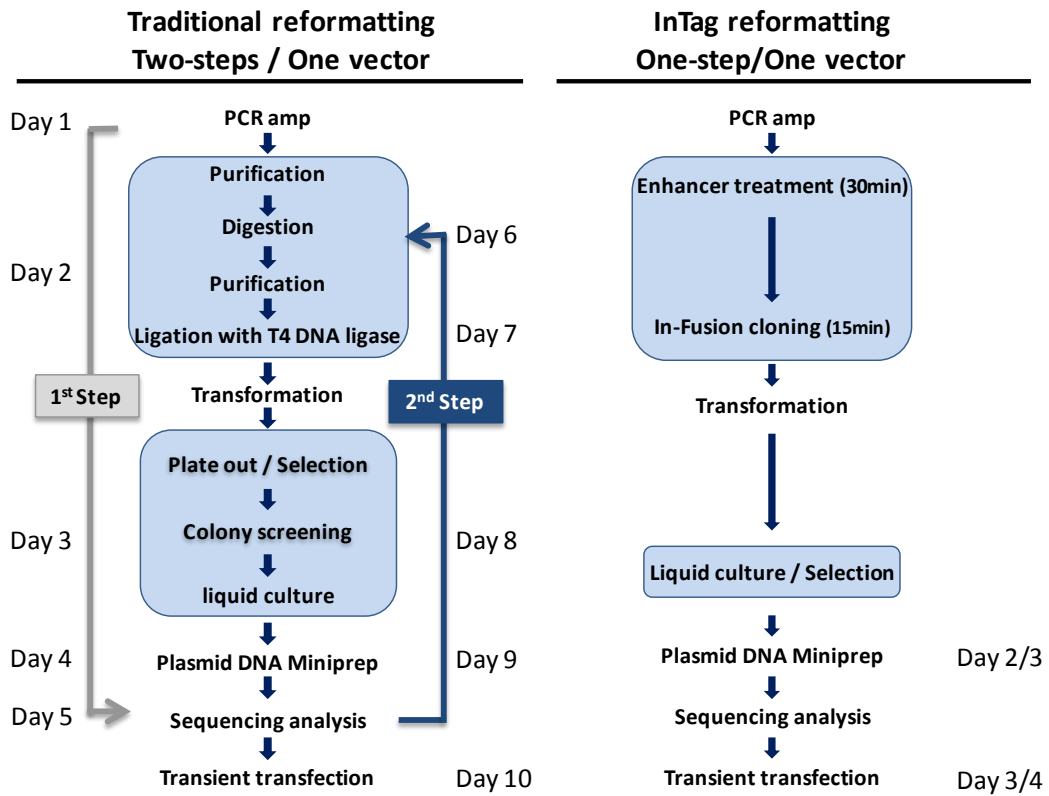

**Supplementary Figure 3. Comparison of workflows**

Comparison of InTag IgG reformatting with traditional two-step cloning using a single expression vector. InTag IgG reformatting method dramatically simplifies the cloning procedure and increases the throughput.
